# Supplementary material
Source: PubMed Central journal article supplement (PMC5788722)
Supplement: NIHMS915605-supplement-Supp_FigS1-7.pdf [file NIHMS915605-supplement-Supp_FigS1-7.pdf]

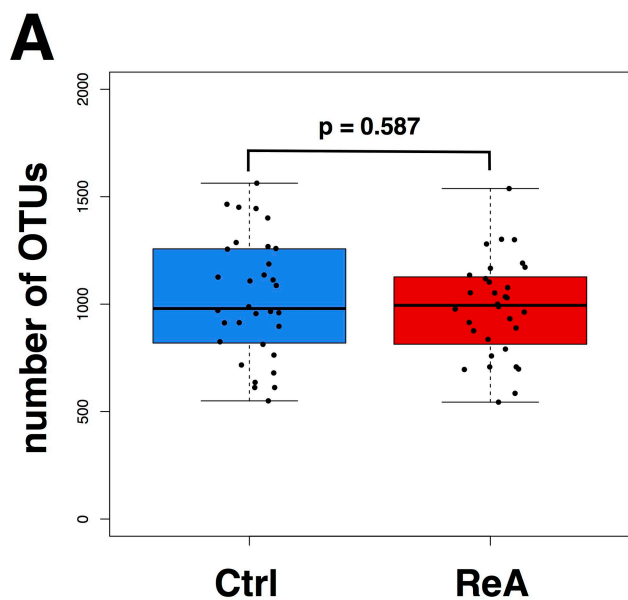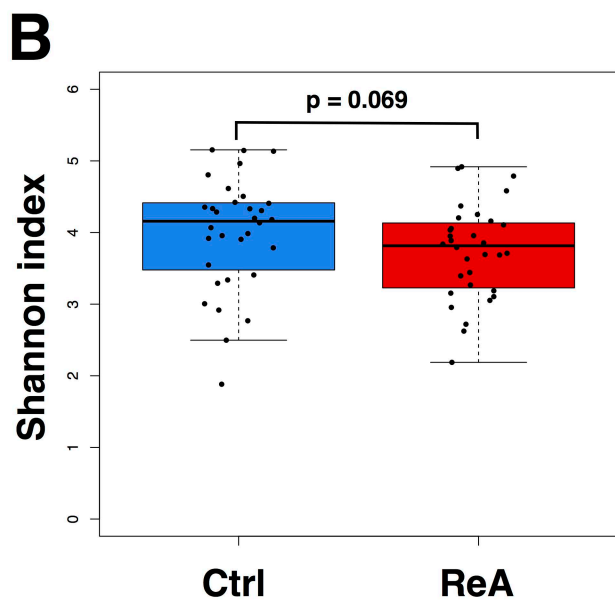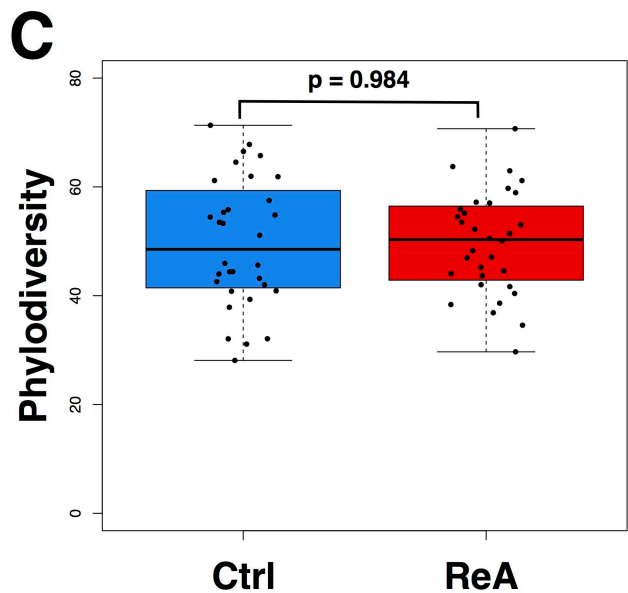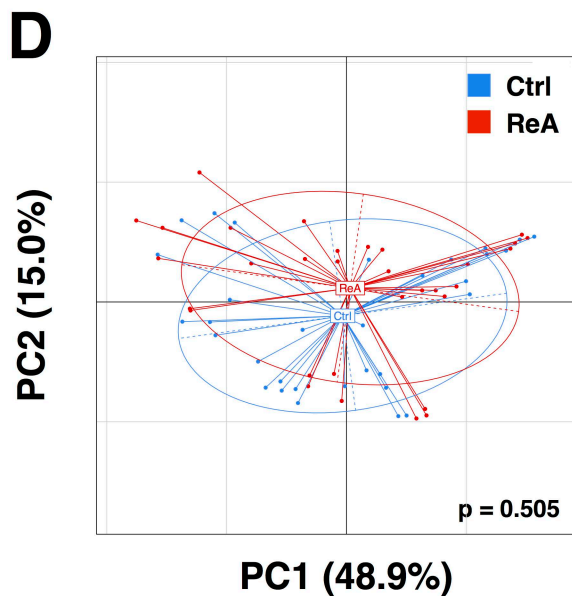

**Supplementary Figure 1**

**A**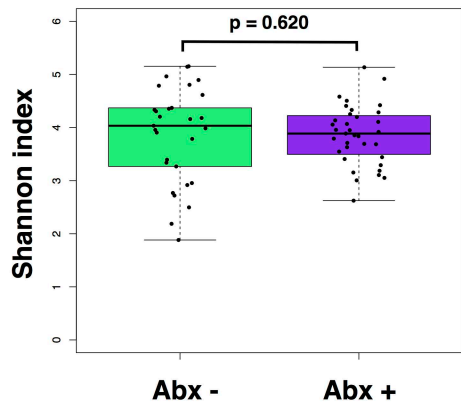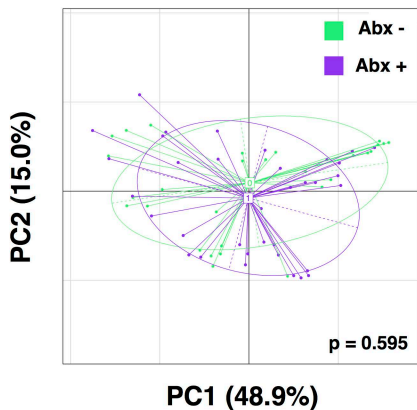**B**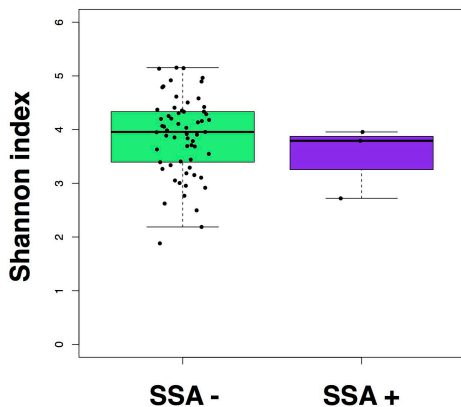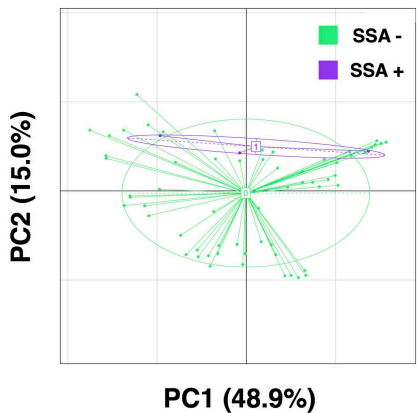**Supplementary Figure 2**

p = 0.042

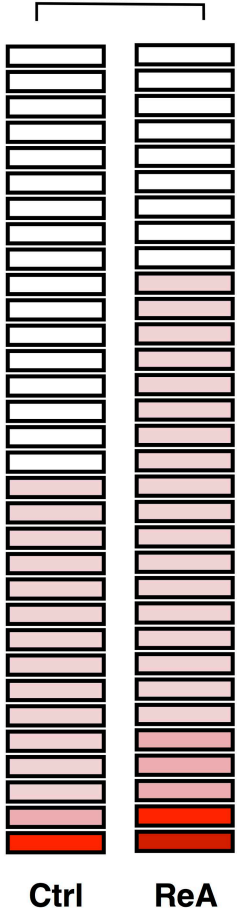

- 0 pathogens
- 1 pathogen
- 2 pathogens
- 3 pathogens
- 4 pathogens

**Pathogens:**  
Salmonella  
Shigella  
Campylobacter  
Erwinia

|                    | Ctrl<br>(n = 32) | ReA<br>(n = 32) |
|--------------------|------------------|-----------------|
| <b>0 pathogens</b> | 17 (53.1%)       | 9 (28.1%)       |
| <b>1 pathogen</b>  | 13 (40.6%)       | 18 (56.3%)      |
| <b>2 pathogens</b> | 1 (3.1%)         | 3 (9.4%)        |
| <b>3 pathogens</b> | 1 (3.1%)         | 1 (3.1%)        |
| <b>4 pathogens</b> | 0 (0.0%)         | 1 (3.1%)        |

**Supplementary Figure 3**

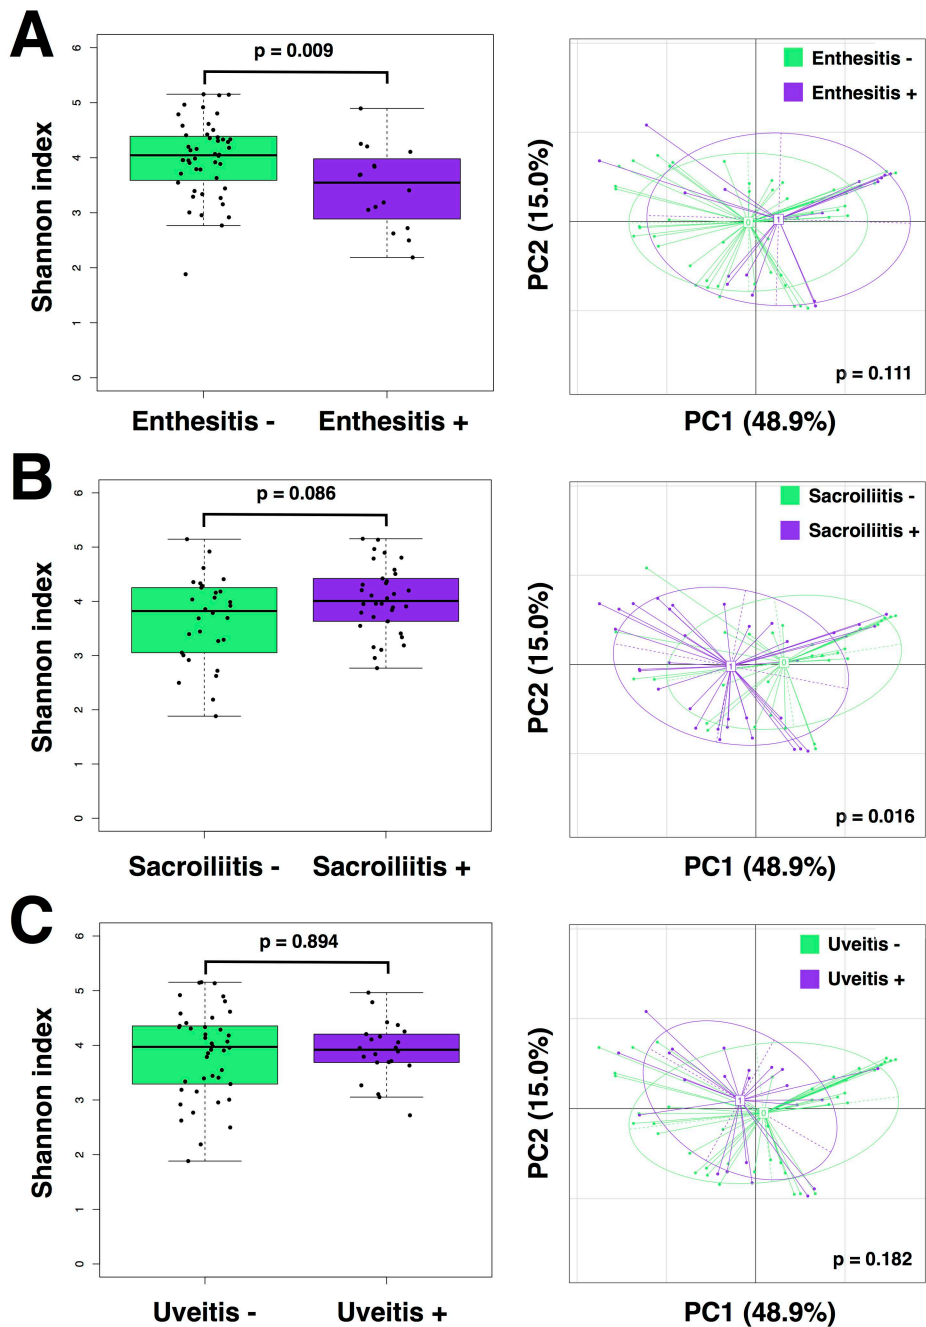

**Supplementary Figure 4**

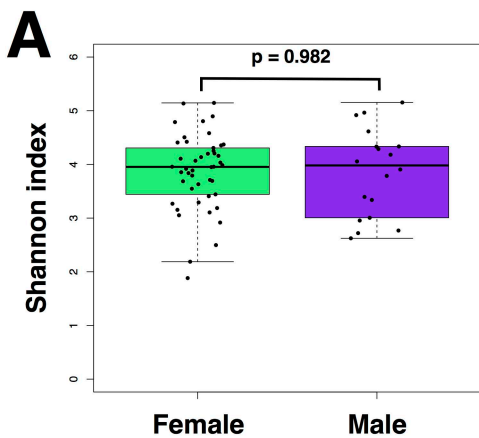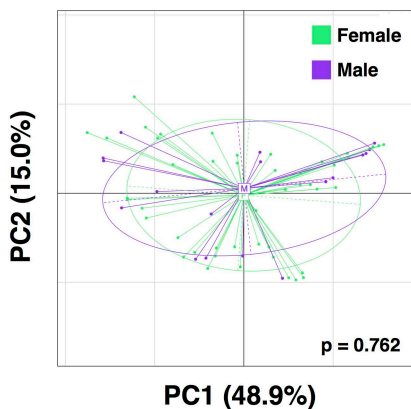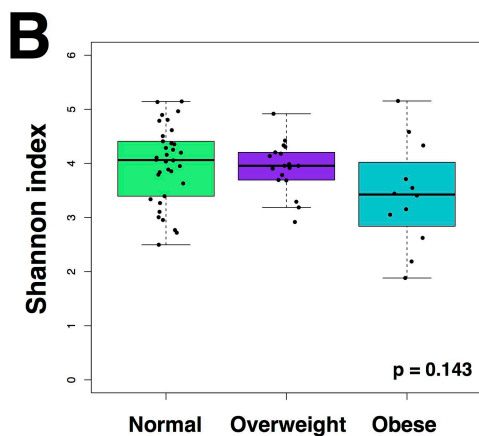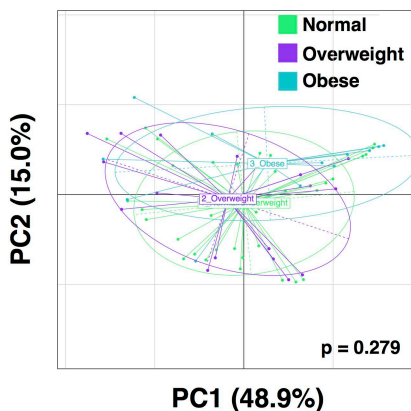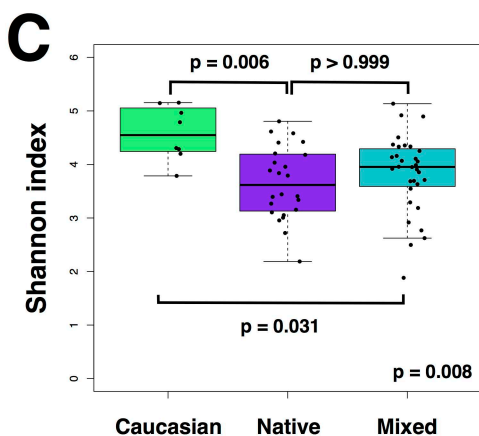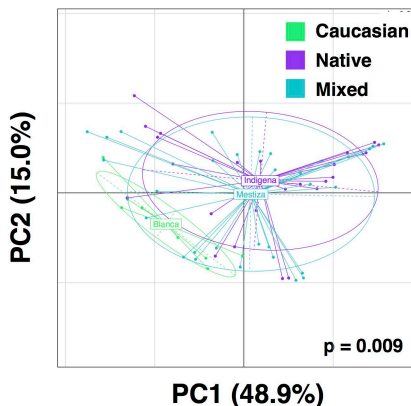

**Supplementary Figure 5**

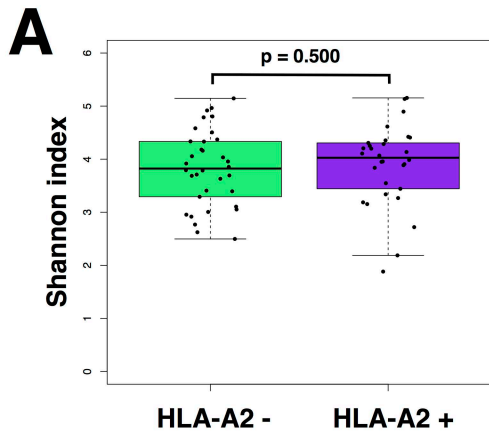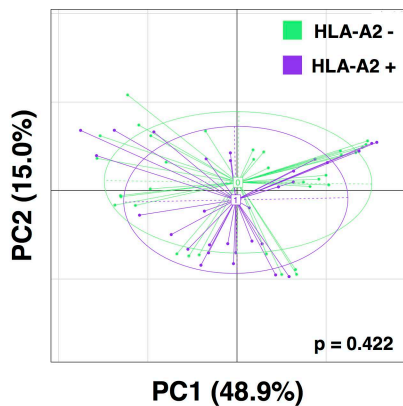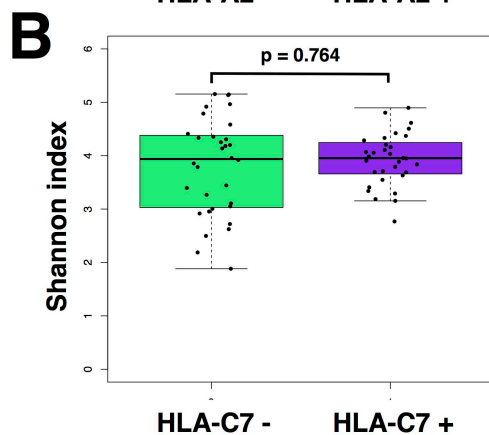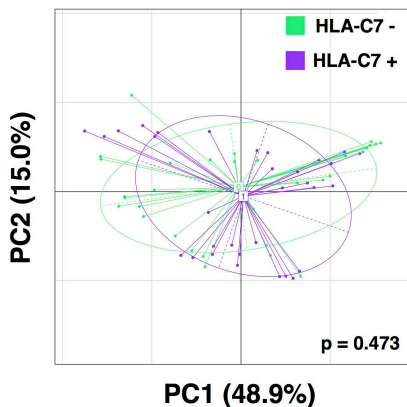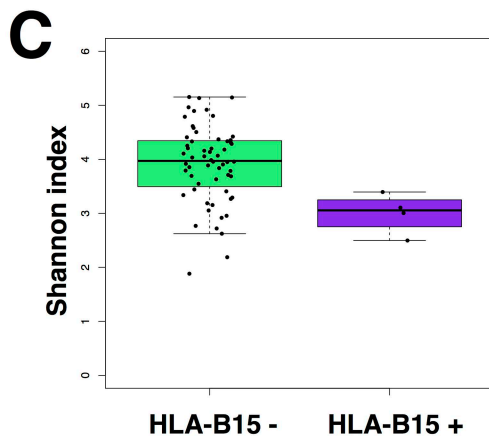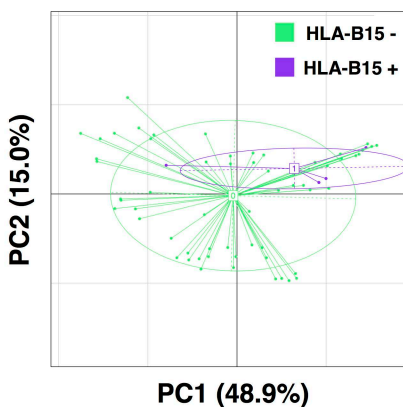

**Supplementary Figure 6**

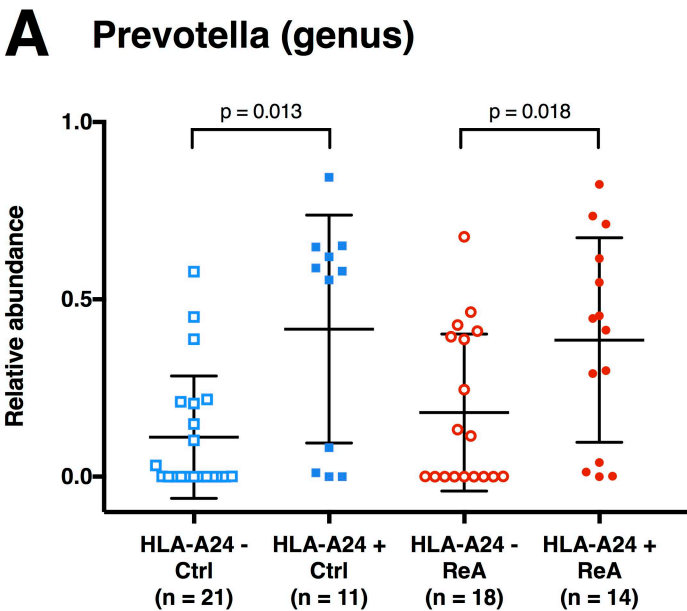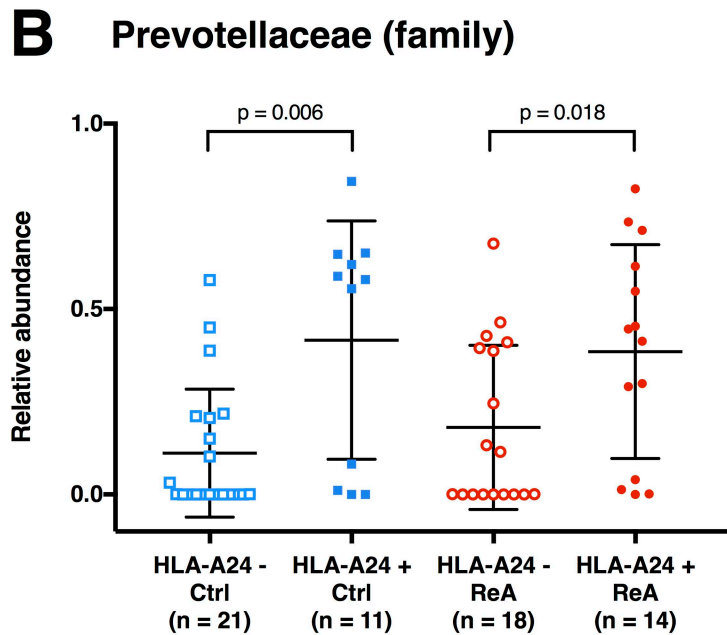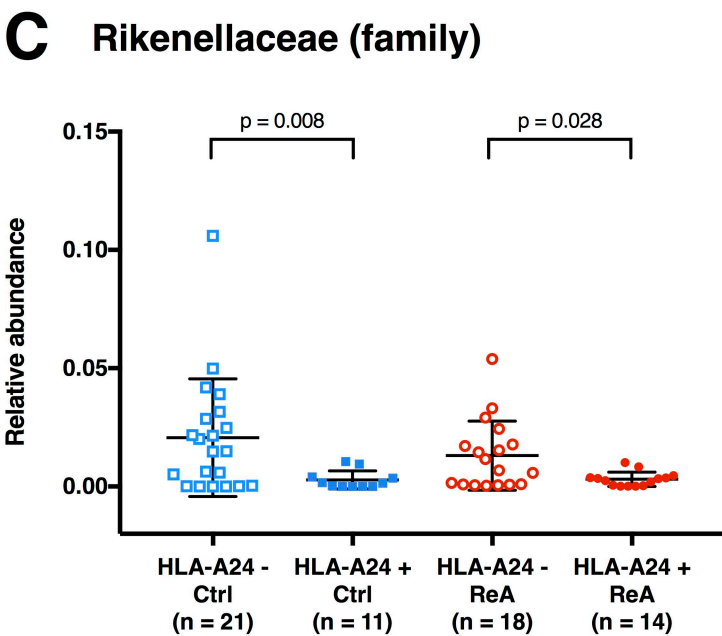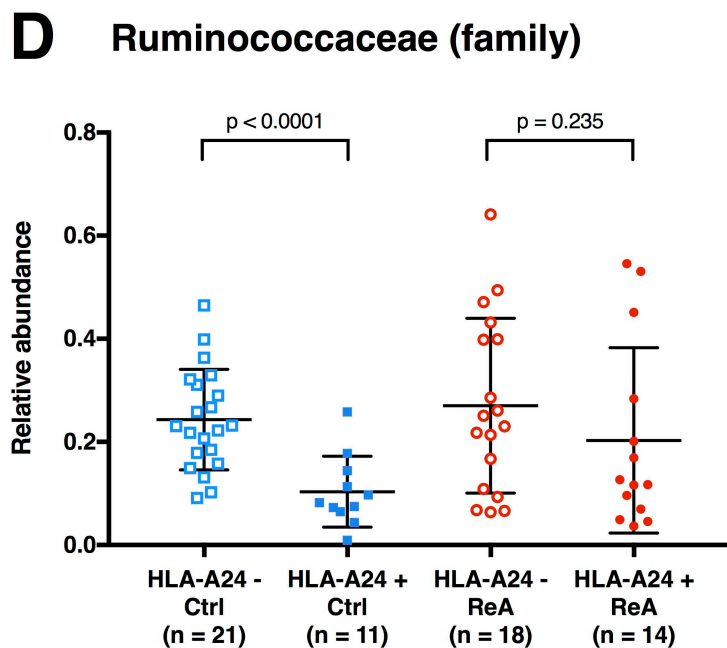

**Supplementary Figure 7**
